# Supplementary material
Source: PubMed Central journal article supplement (PMC5675053)

Figure S9  
Blot Fig. 5B

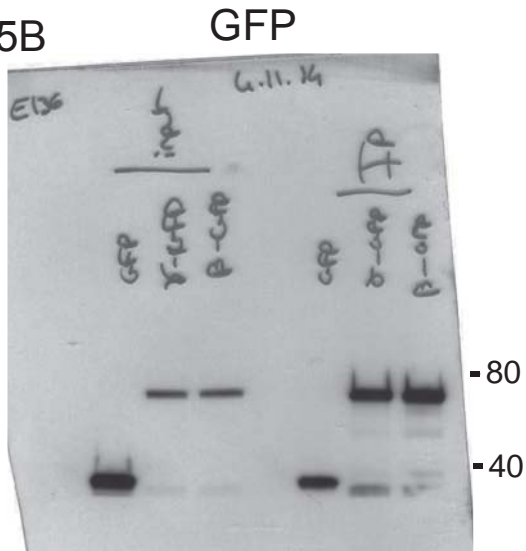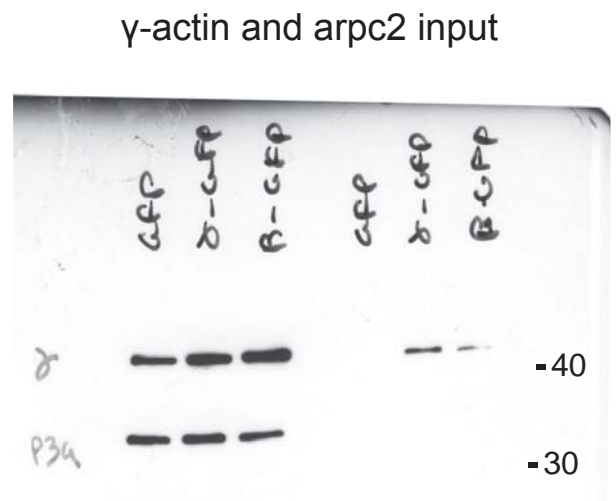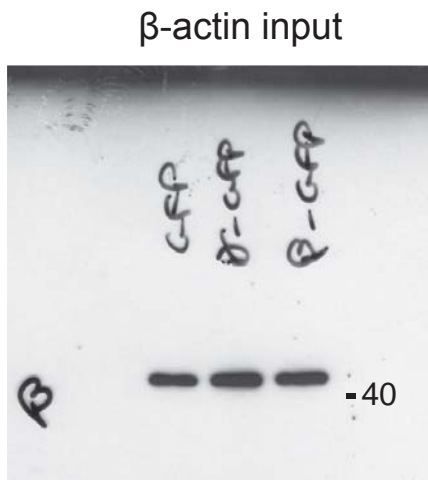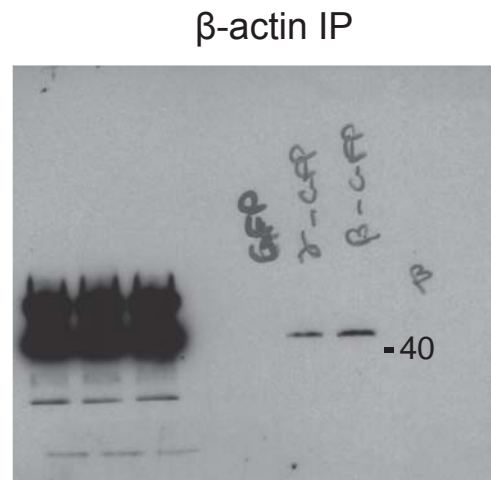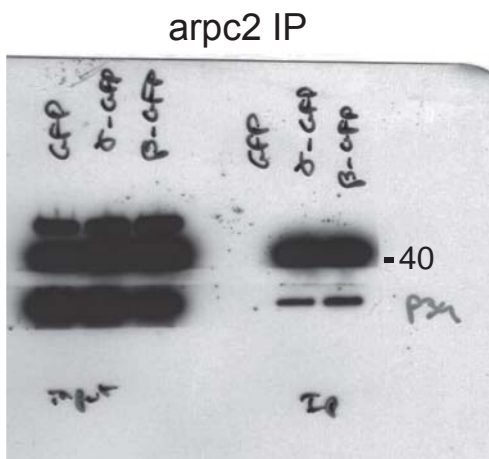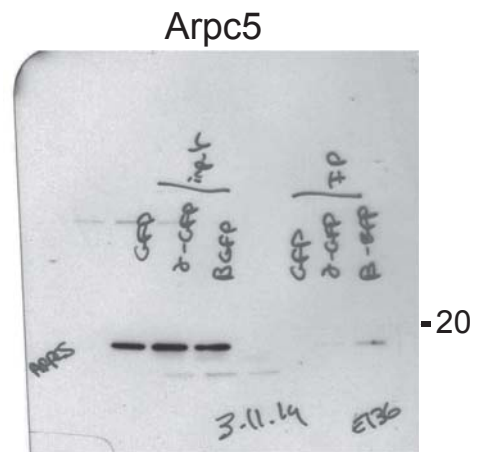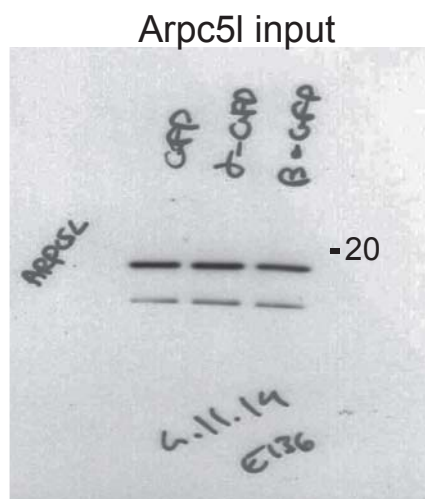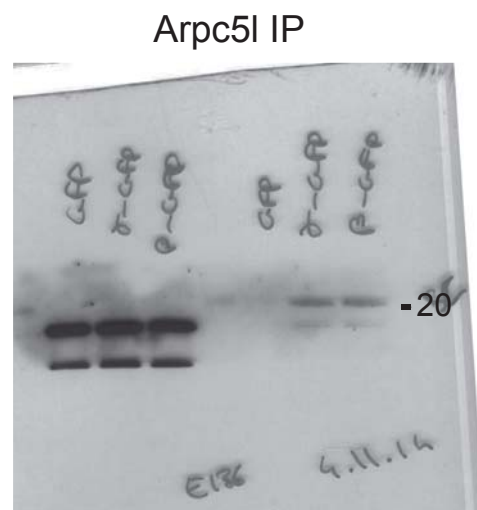

blot: Fig. 5A

GFP

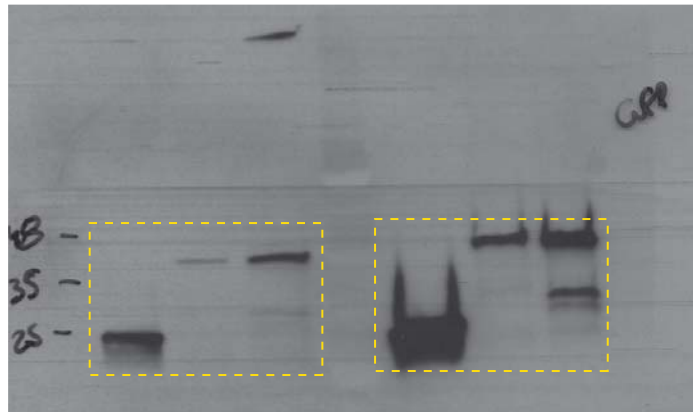

$\gamma$ -actin input

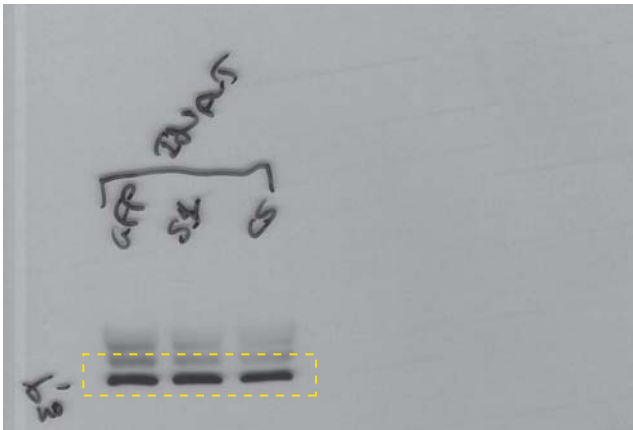

$\gamma$ -actin IP

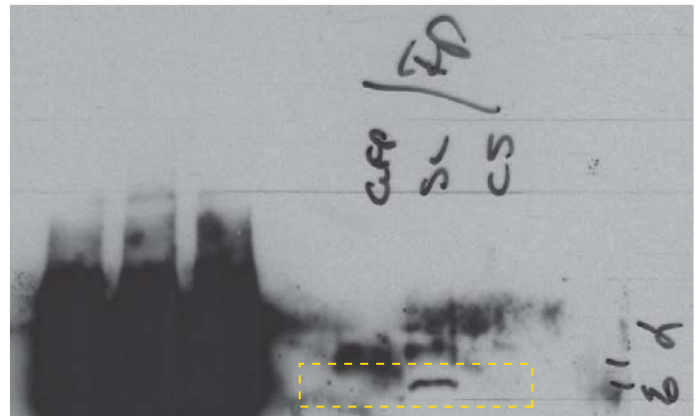

$\beta$ -actin input

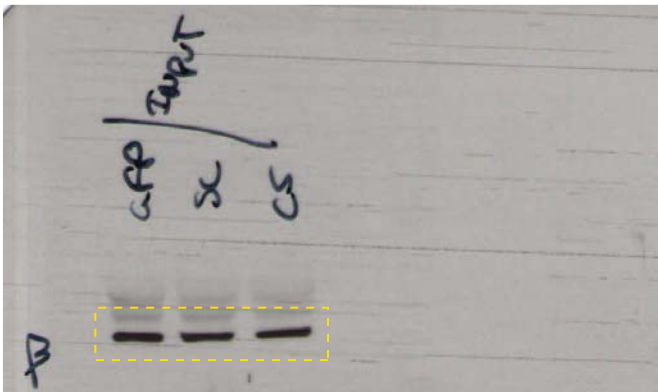

$\beta$ -actin IP

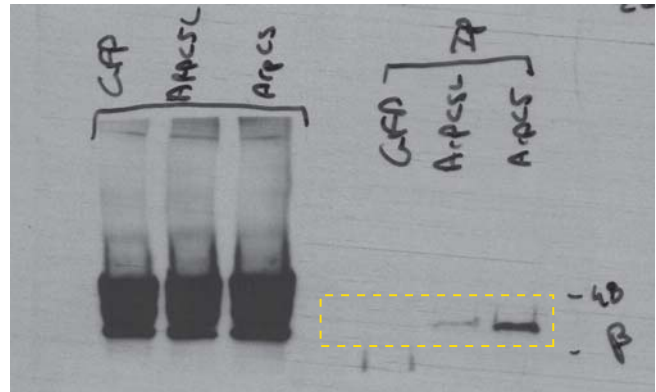

arpc2

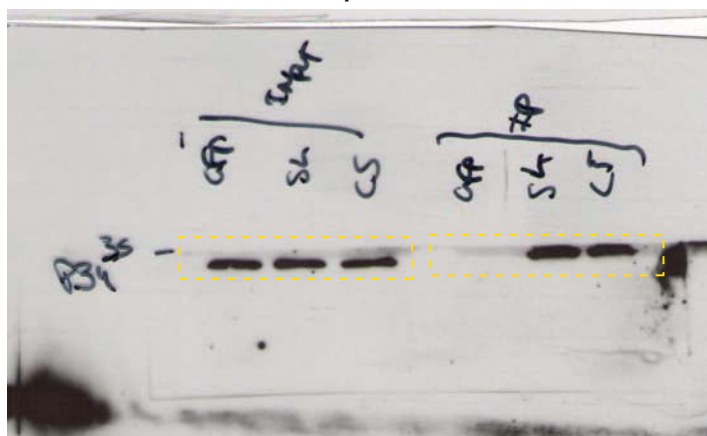

Blot Fig. 5C

Arpc5

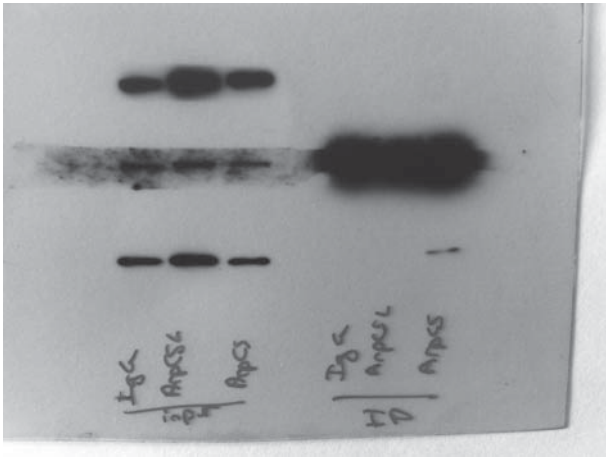

gamma actin

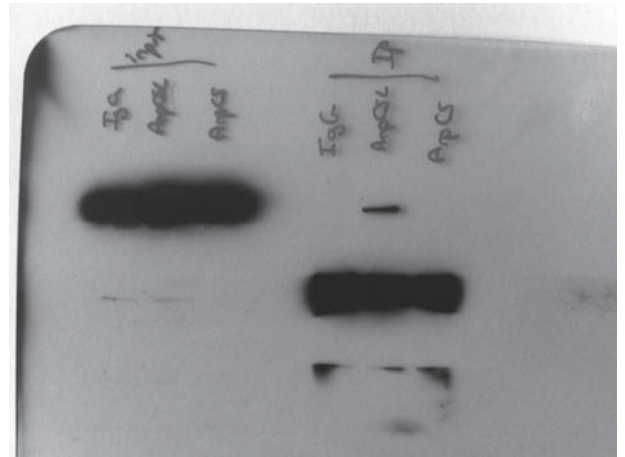

Arpc5L

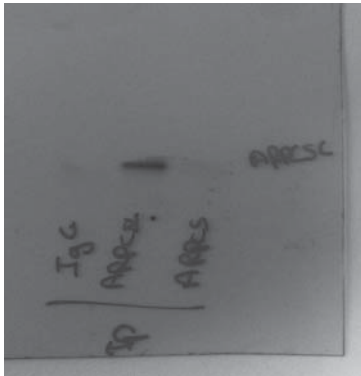

gamma actin

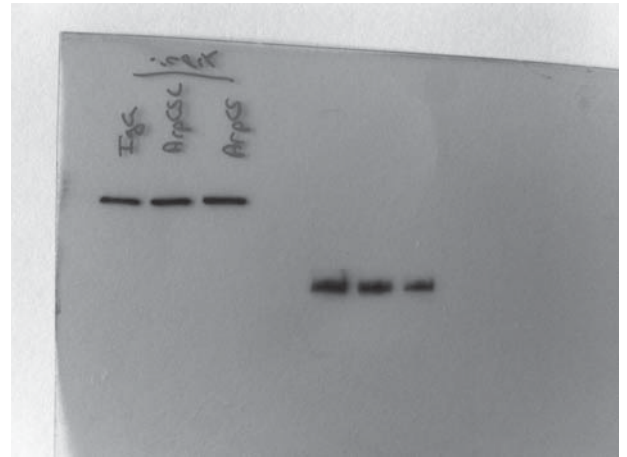

Blot Fig. S2A

Desmin and GAPDH

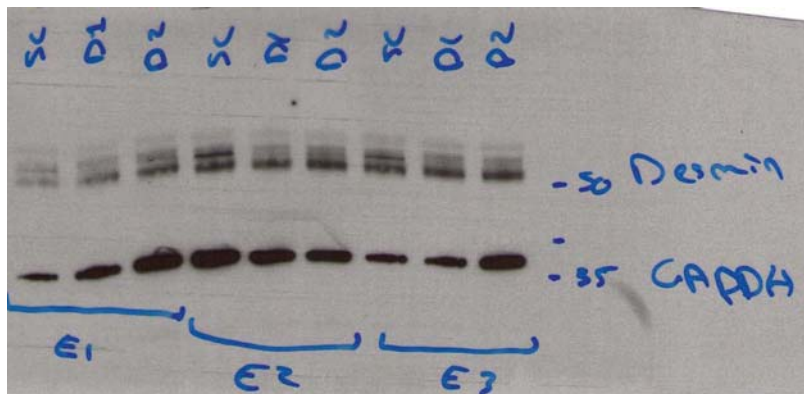

Blot Fig. S3B

gamma actin

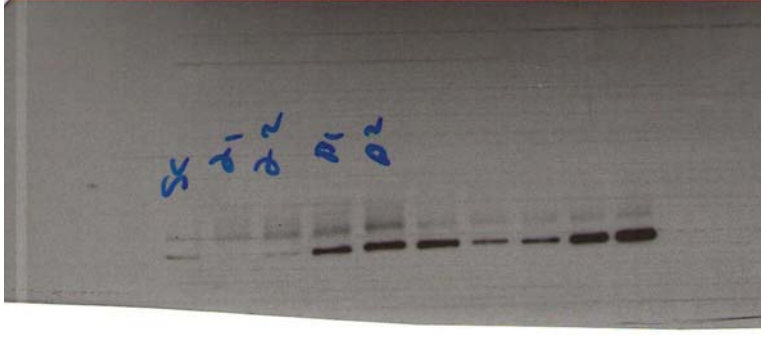

GAPDH

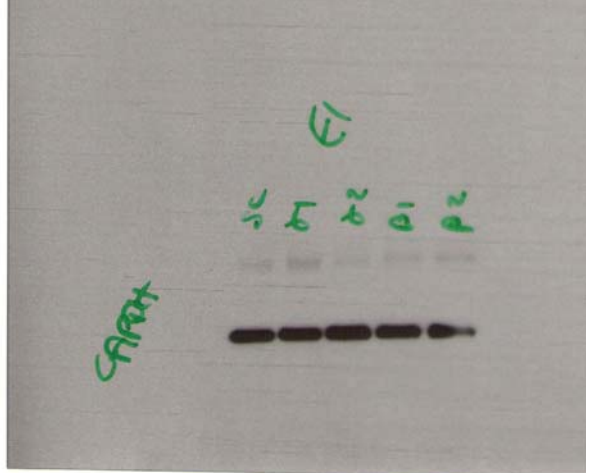

gamma actin

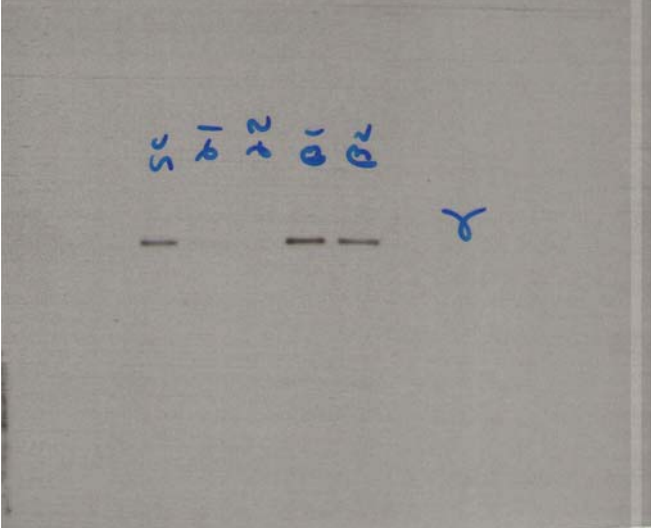

Blot Fig. S4H

Arpc5

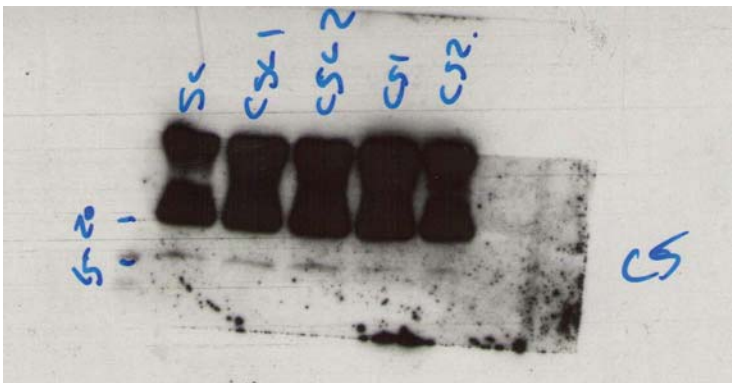

GAPDH

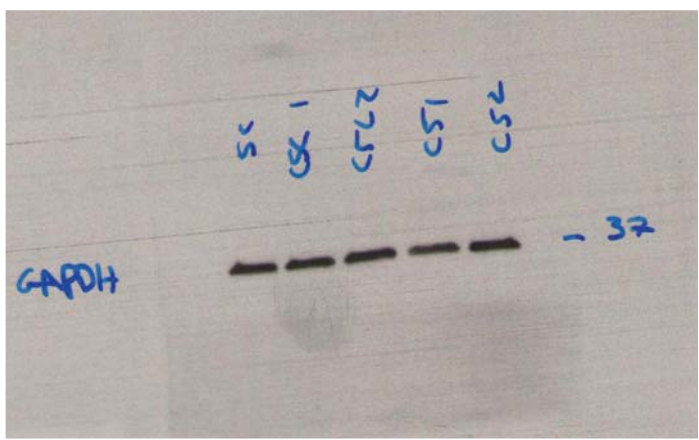

Arpc5L

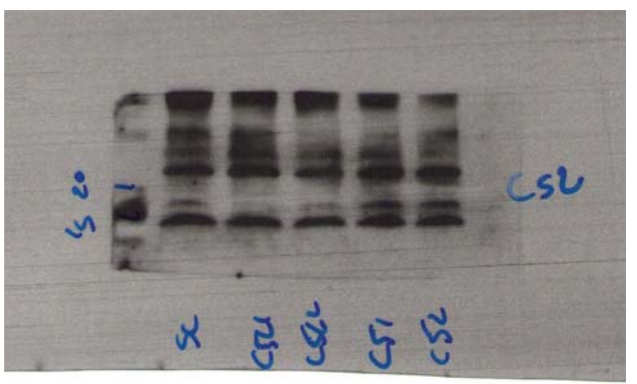

Blot Fig. S5E

GAPDH

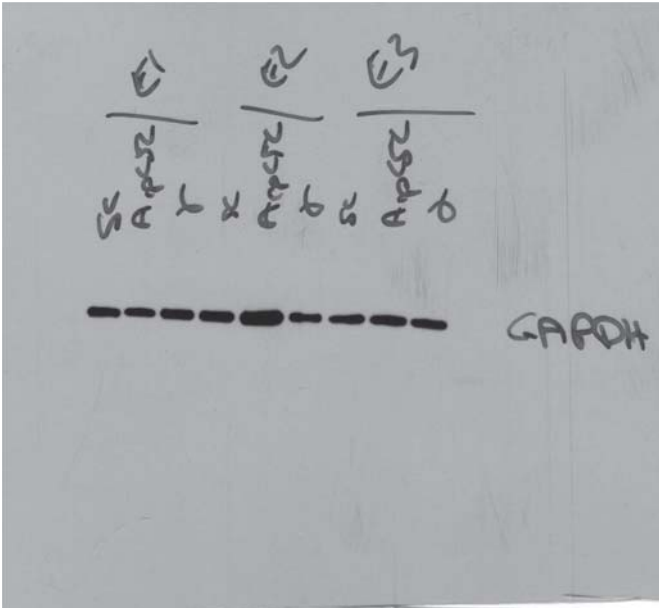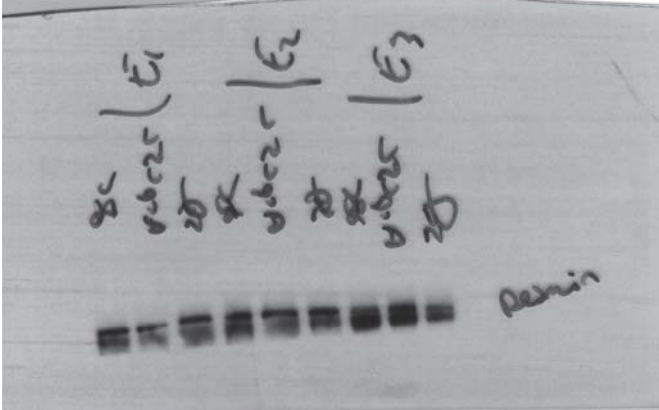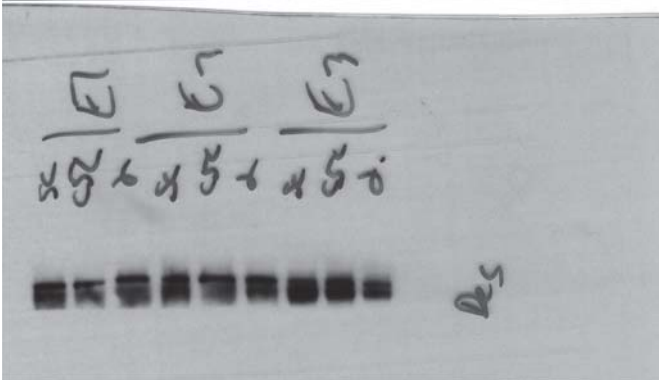

Desmin

Blot Fig. S5I

GAPDH

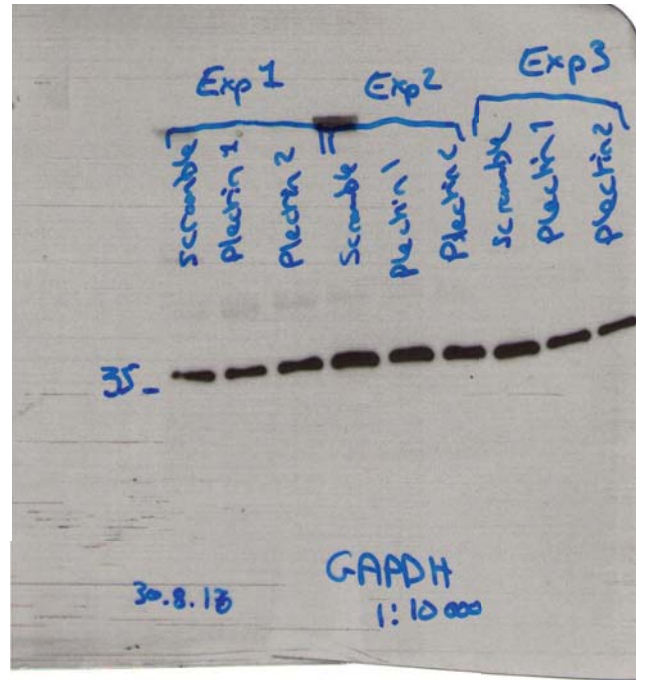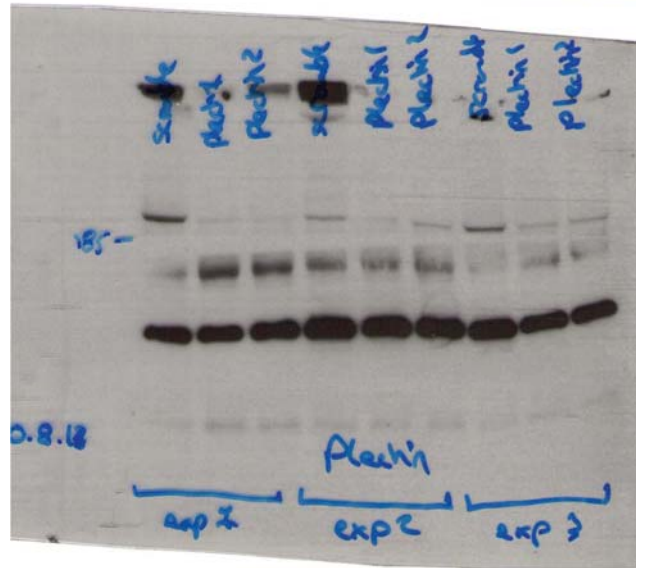

Plectin

Blot Fig. S7A

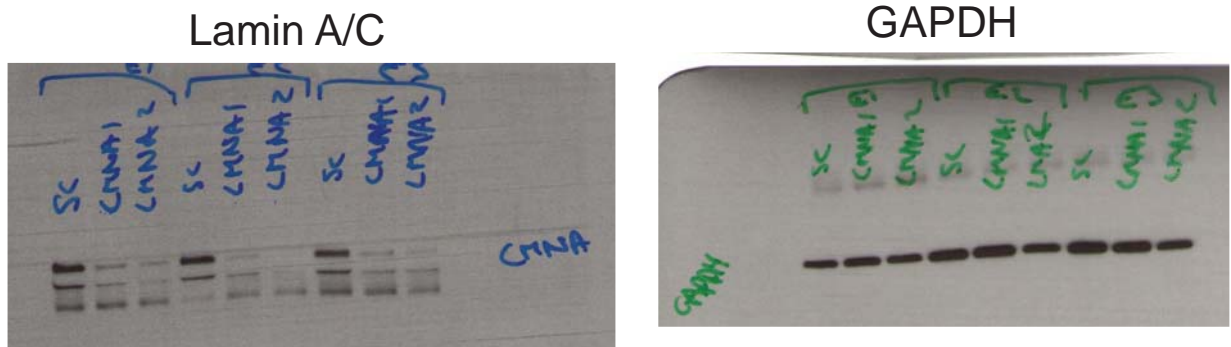

Blot Fig. S7G

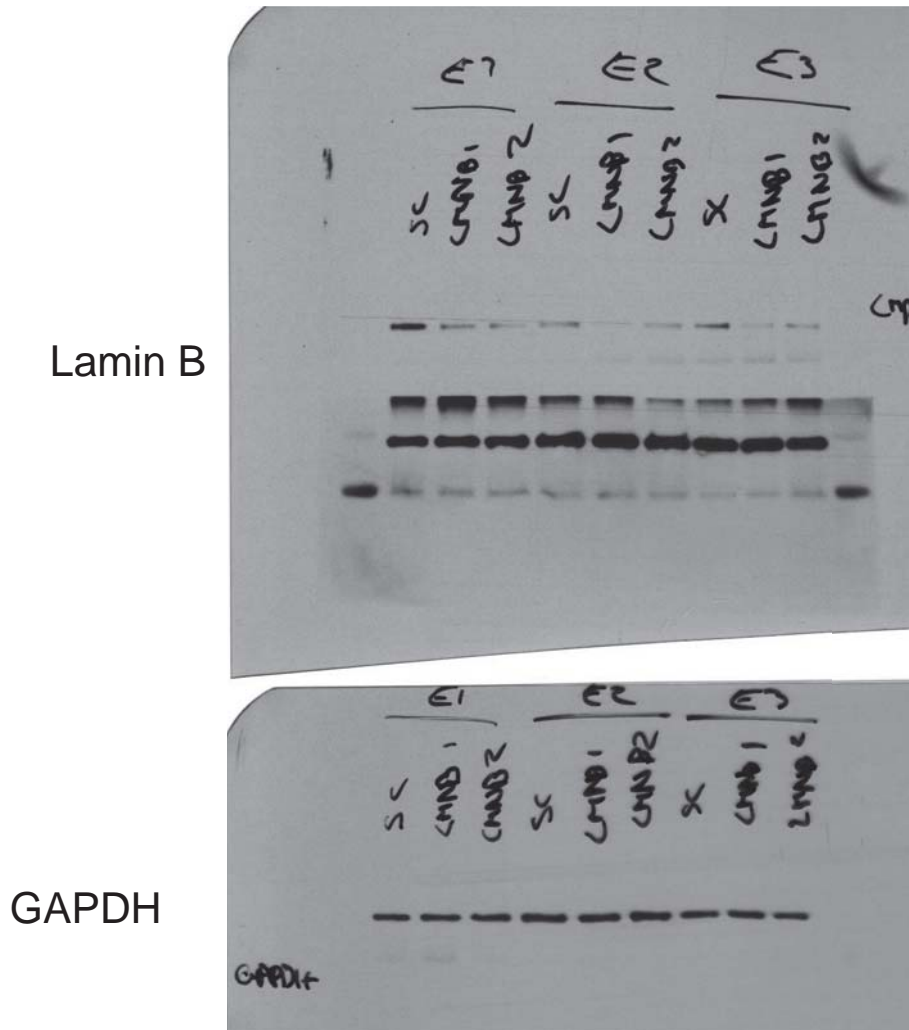

Supplement: NIHMS73663-supplement-Figure_S9.pdf [file NIHMS73663-supplement-Figure_S9.pdf]
