# Supplementary material
Source: PubMed Central journal article supplement (PMC5675053)

Figure S3

A

| Actin name                     | Abbreviation                    | Gene symbol | Expression           |
|--------------------------------|---------------------------------|-------------|----------------------|
| Actin alpha 1, skeletal muscle | $\alpha$ - <sub>sk</sub> -actin | Acta1       | Skeletal muscle      |
| Actin alpha 2, smooth muscle   | $\alpha$ - <sub>sm</sub> -actin | Acta2       | Smooth muscle, aorta |
| Actin alpha, cardiac 1         | $\alpha$ - <sub>ca</sub> -actin | Actc1       | Heart                |
| Actin beta 1                   | $\beta$ -actin                  | Actb1       | Ubiquitous           |
| Actin gamma 1                  | $\gamma$ -actin                 | Actg1       | Ubiquitous           |
| Actin gamma 2, smooth muscle   | $\gamma$ - <sub>sm</sub> -actin | Actg2       | Smooth muscle        |

B

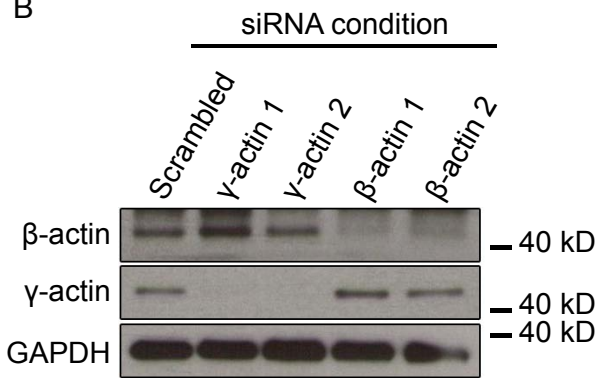

C

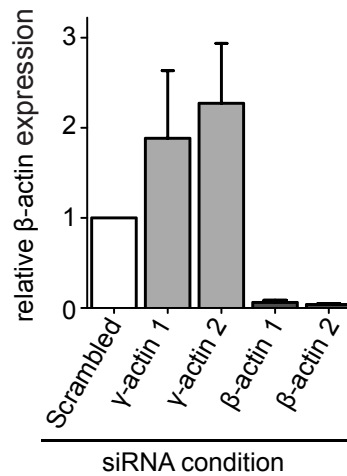

D

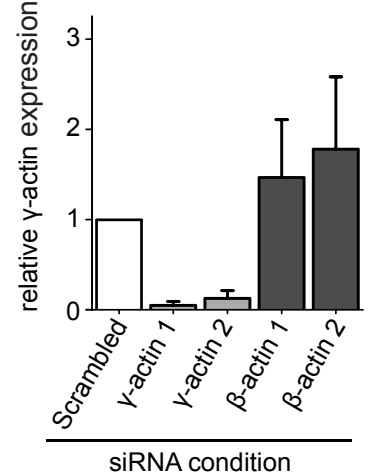

E

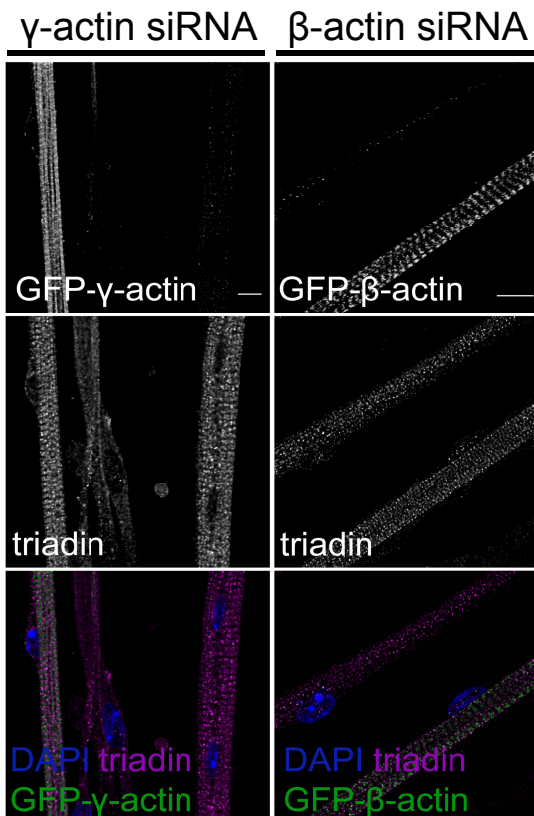

F

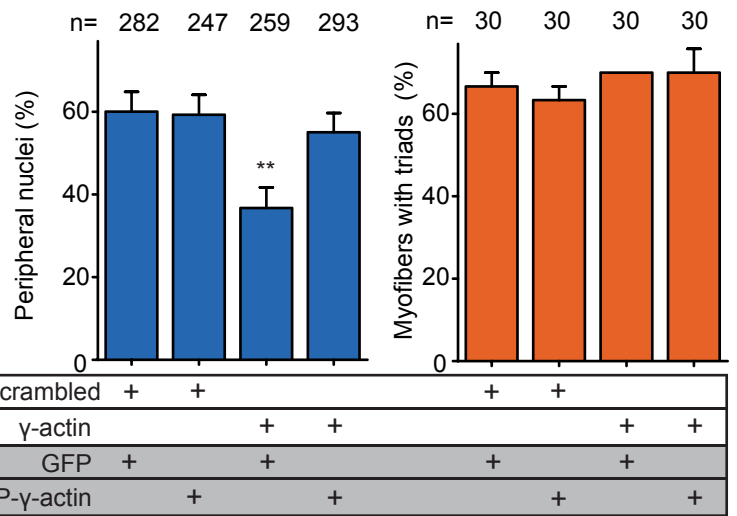

G

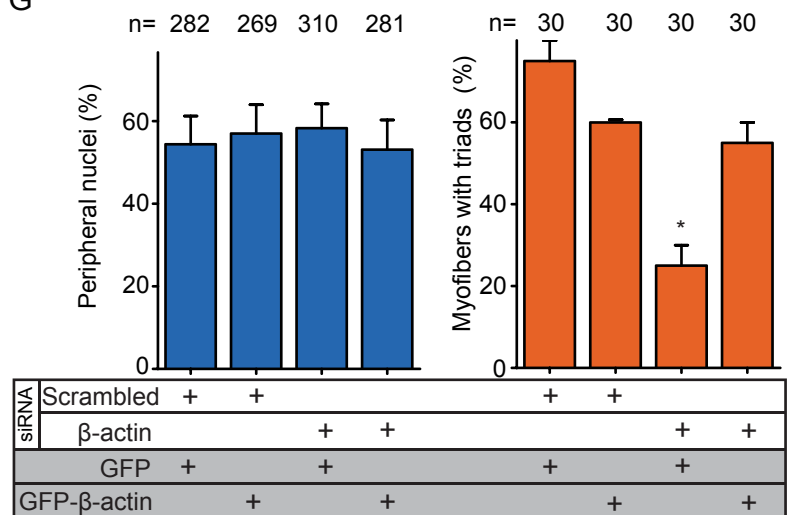

Supplement: NIHMS73663-supplement-Figure_S3.pdf [file NIHMS73663-supplement-Figure_S3.pdf]
