# Supplementary material
Source: PubMed Central journal article supplement (PMC5675053)

Figure S1

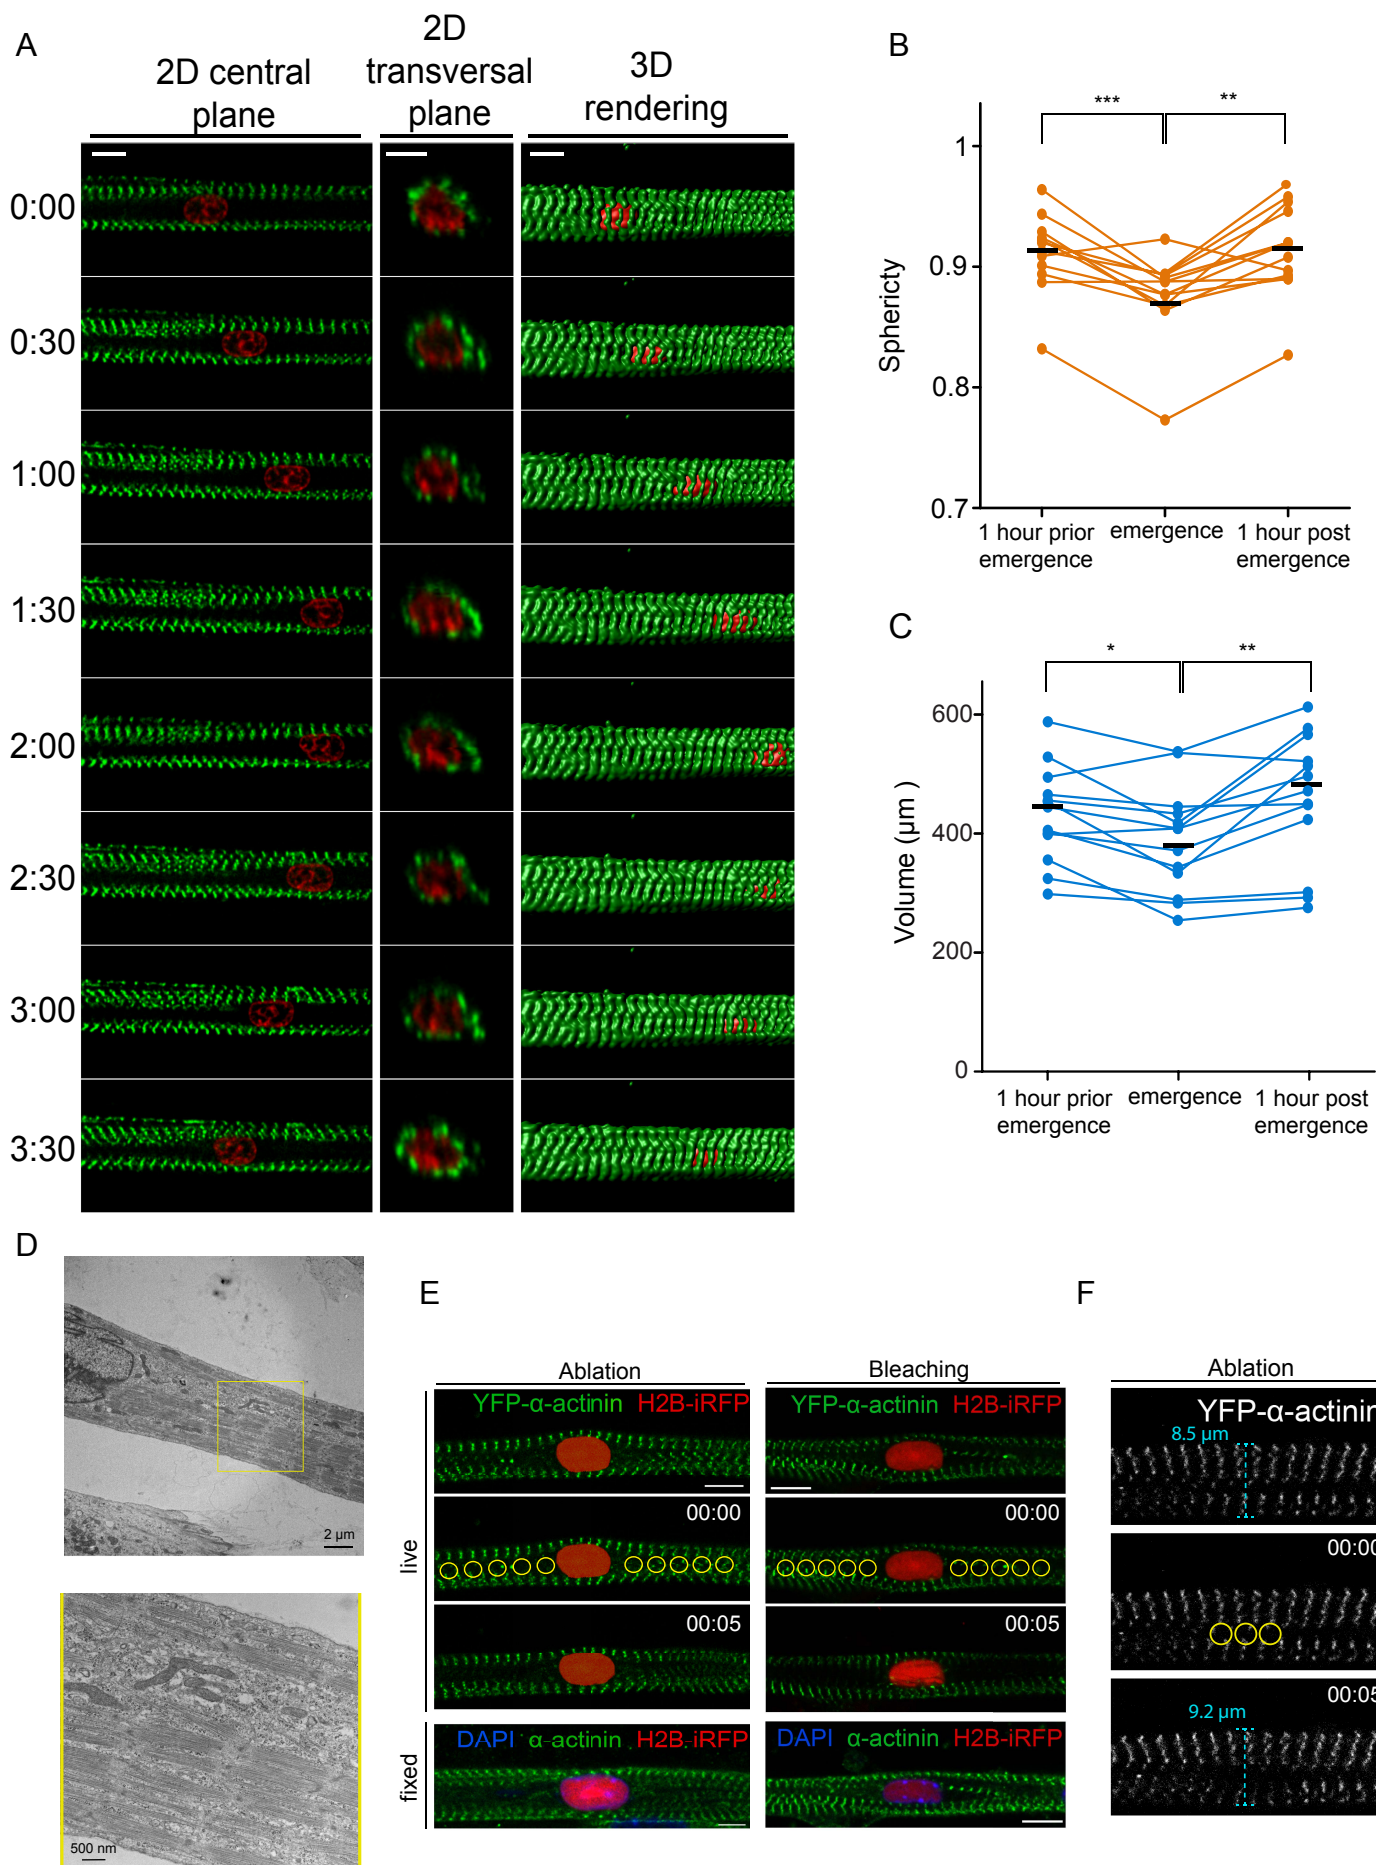

Supplement: NIHMS73663-supplement-Figure_S1.pdf [file NIHMS73663-supplement-Figure_S1.pdf]

Figure S2

A

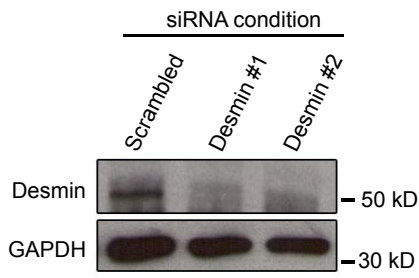

B

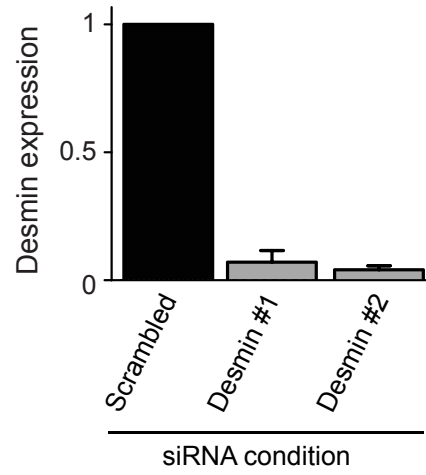

C

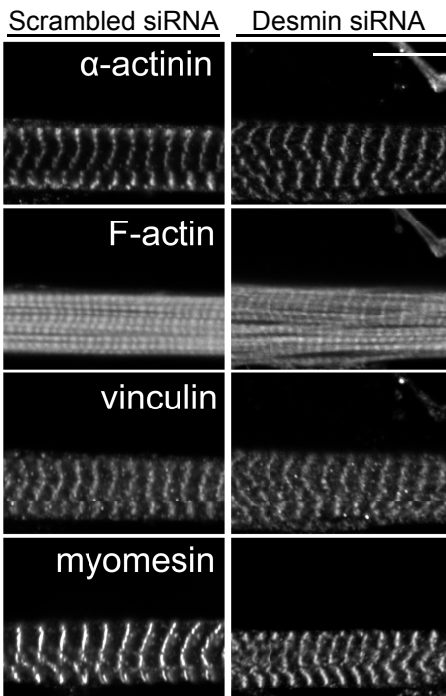

D

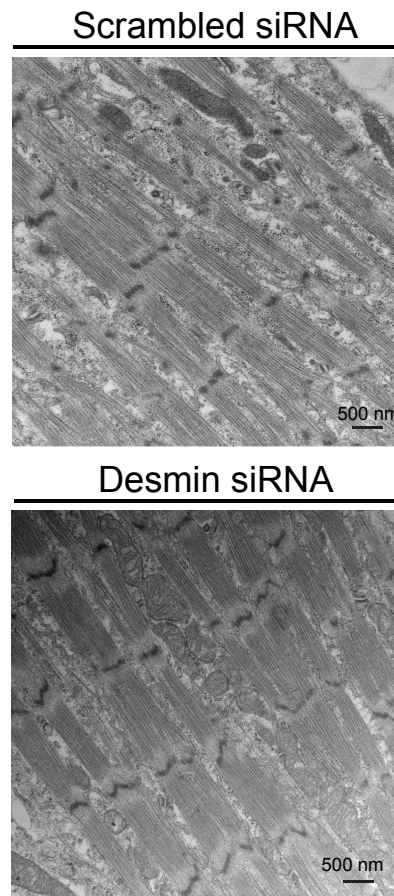

E

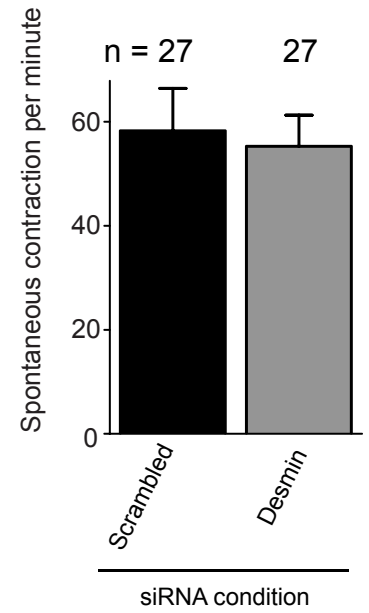

Supplement: NIHMS73663-supplement-Figure_S2.pdf [file NIHMS73663-supplement-Figure_S2.pdf]

Figure S4

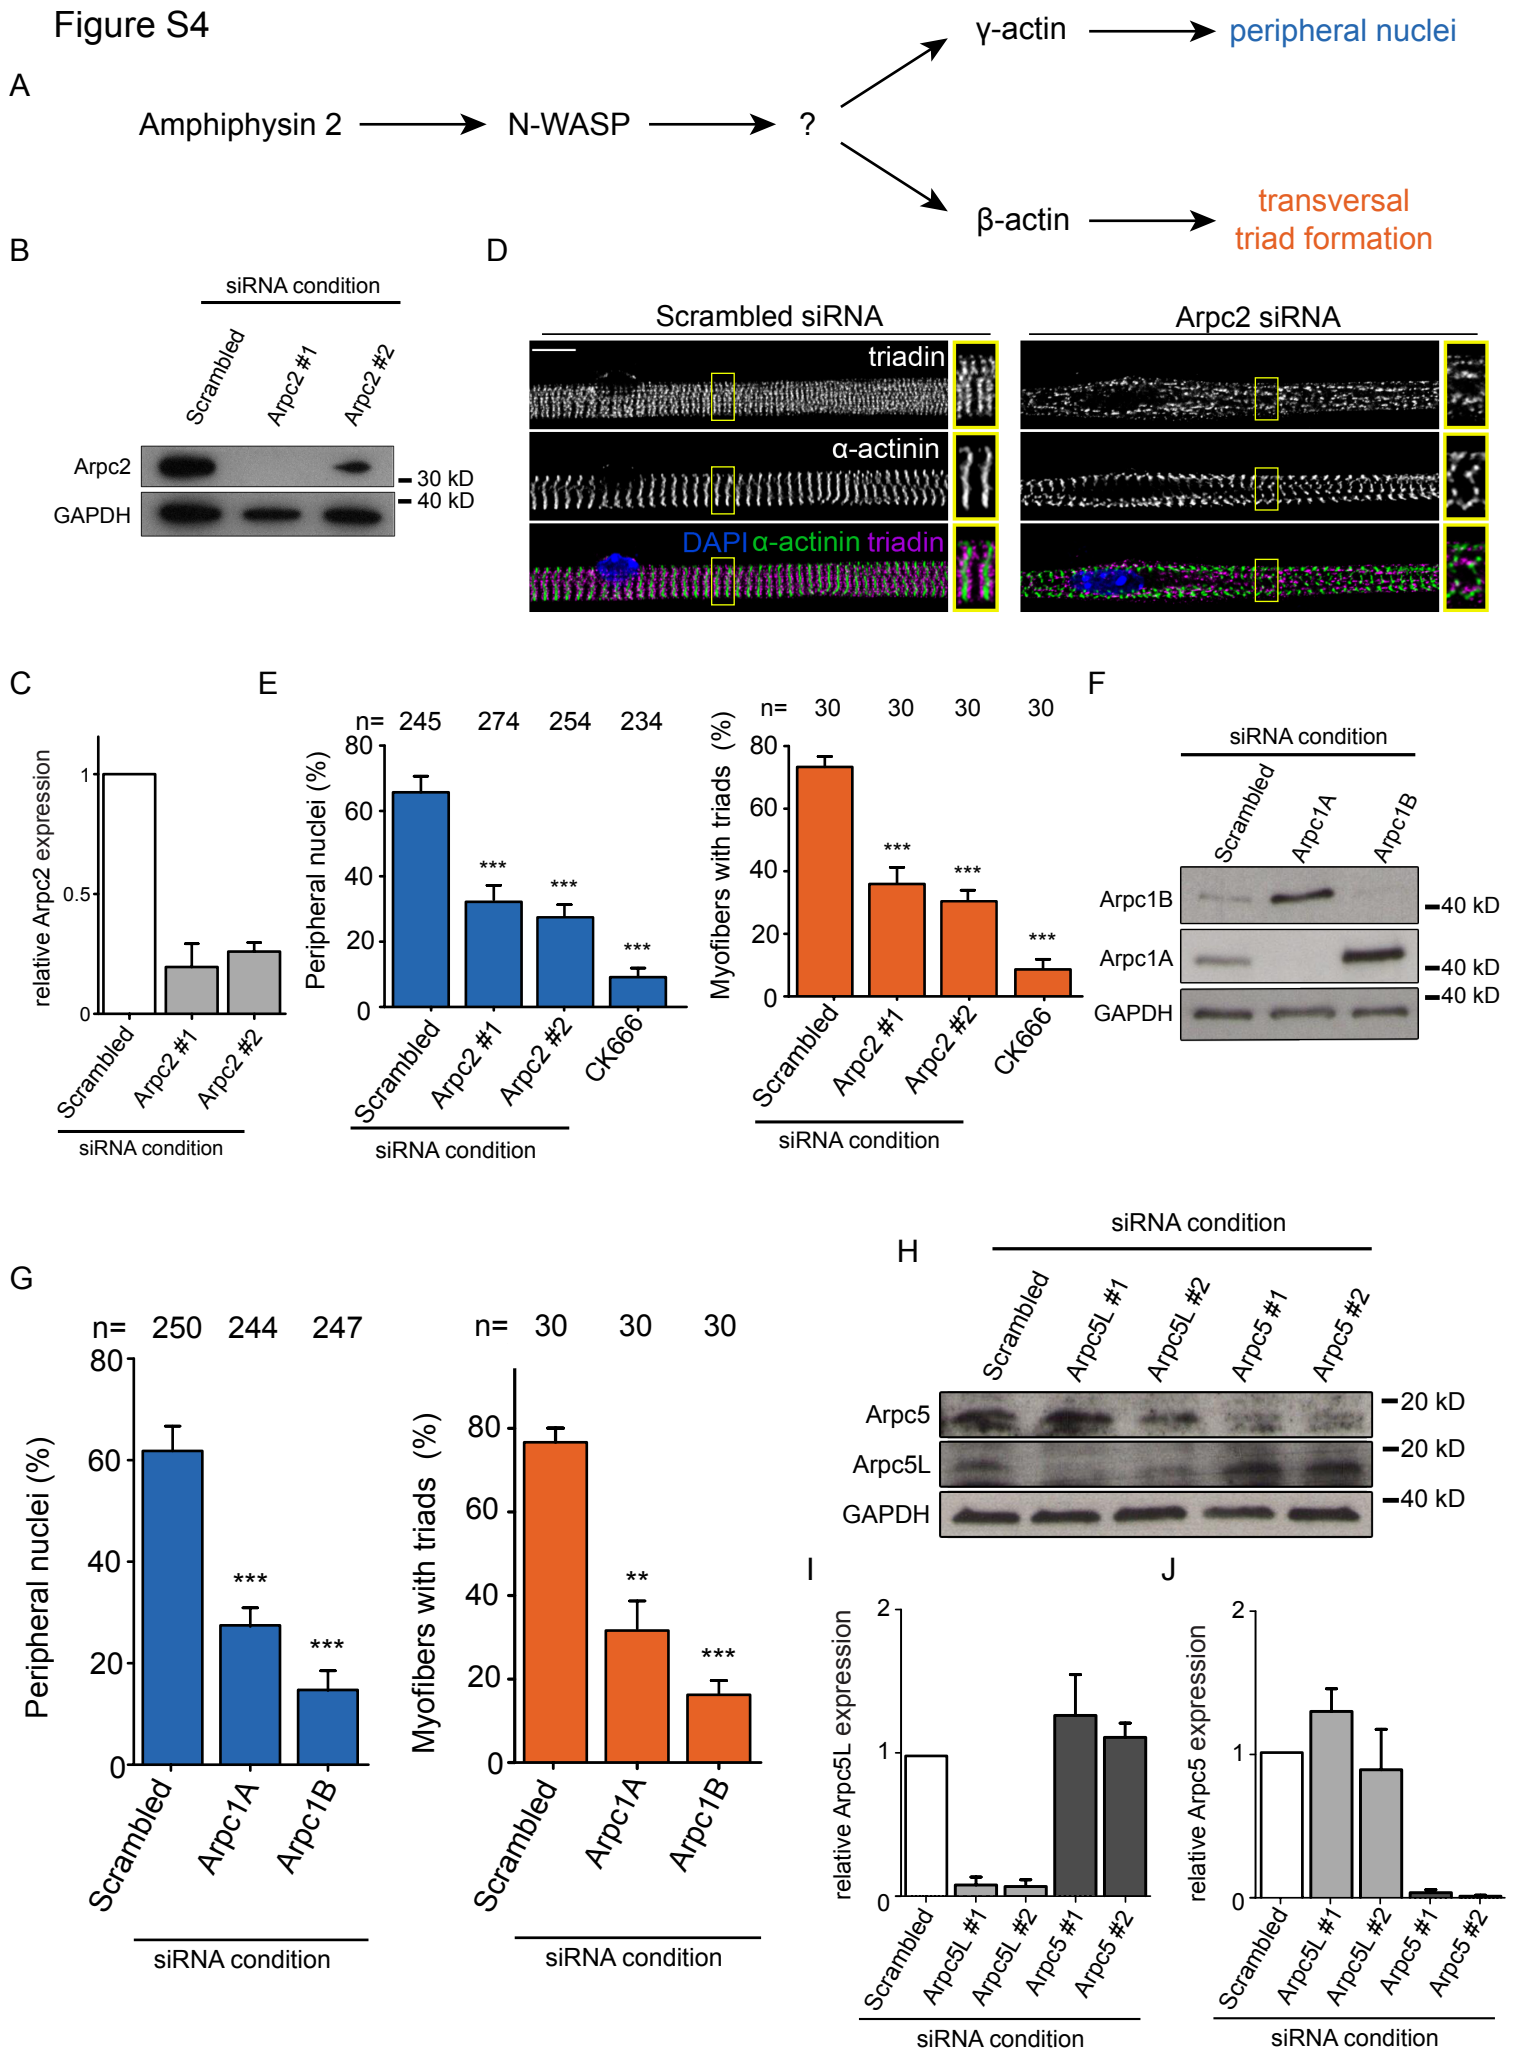

Supplement: NIHMS73663-supplement-Figure_S4.pdf [file NIHMS73663-supplement-Figure_S4.pdf]

Figure S5

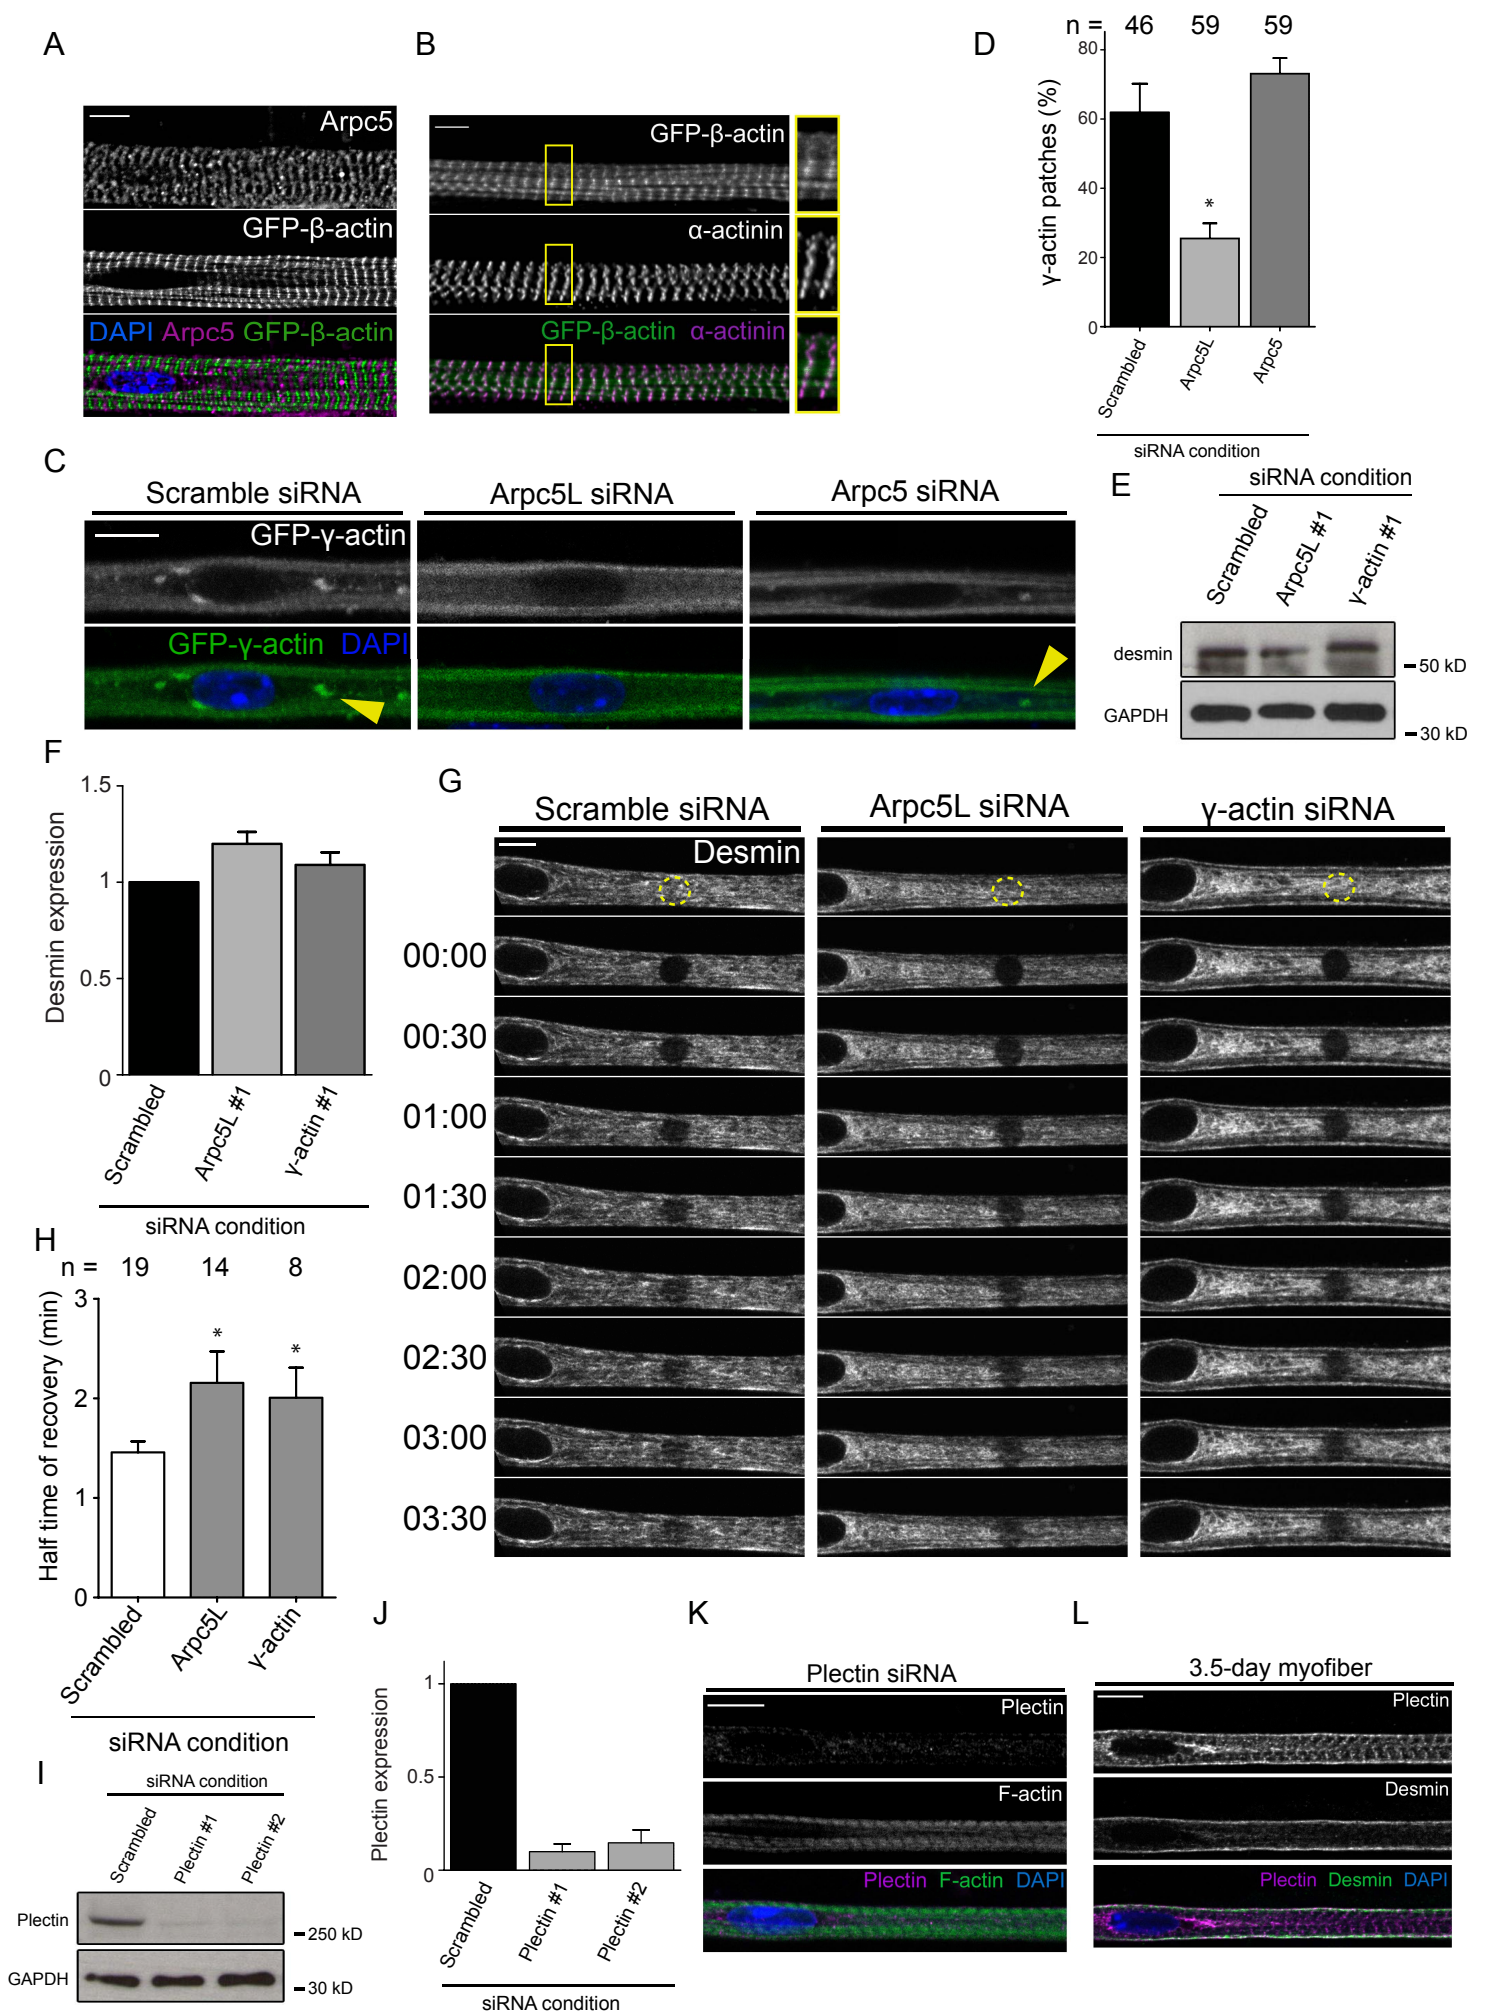

Supplement: NIHMS73663-supplement-Figure_S5.pdf [file NIHMS73663-supplement-Figure_S5.pdf]

Figure S6

A

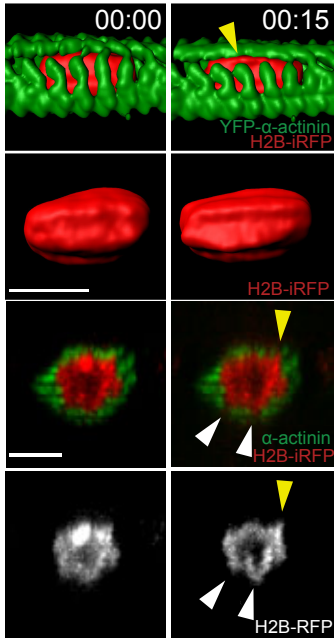

B

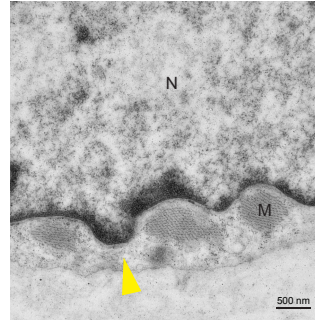

C

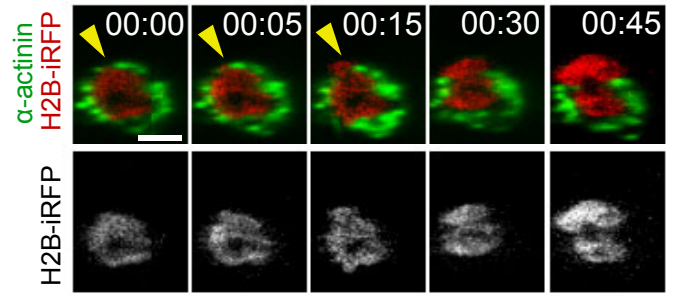

D

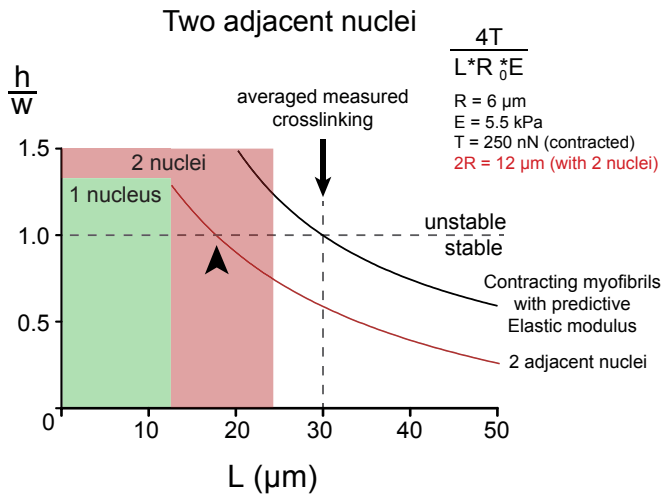

E

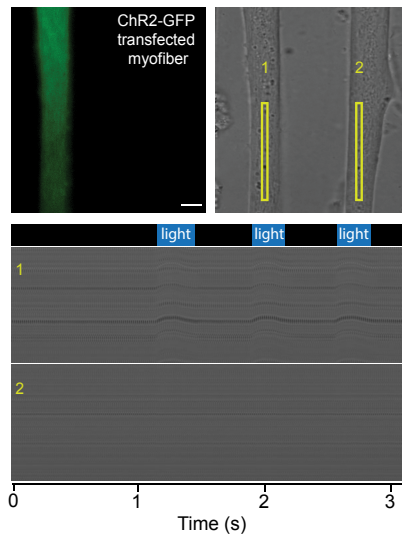

F

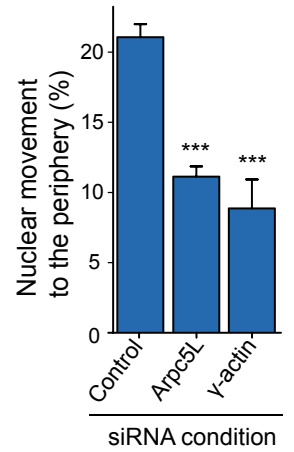

G

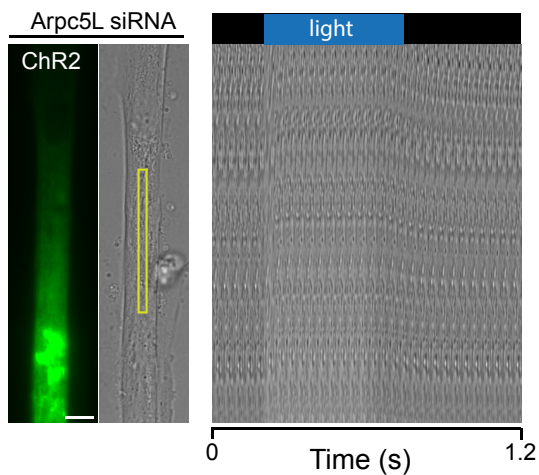

H

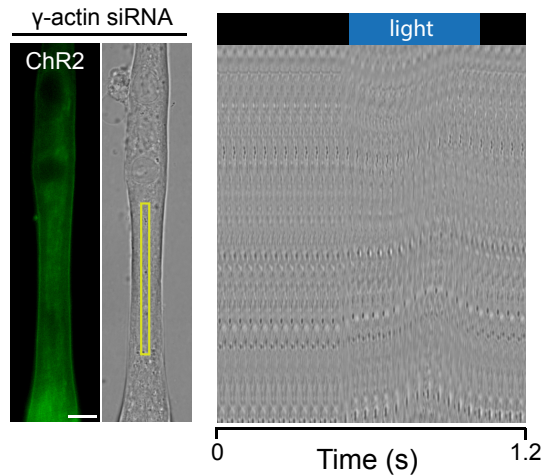

I

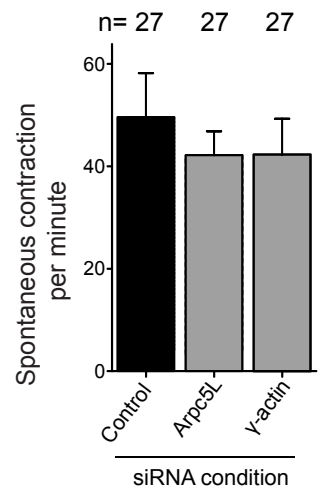

Supplement: NIHMS73663-supplement-Figure_S6.pdf [file NIHMS73663-supplement-Figure_S6.pdf]

Figure S7

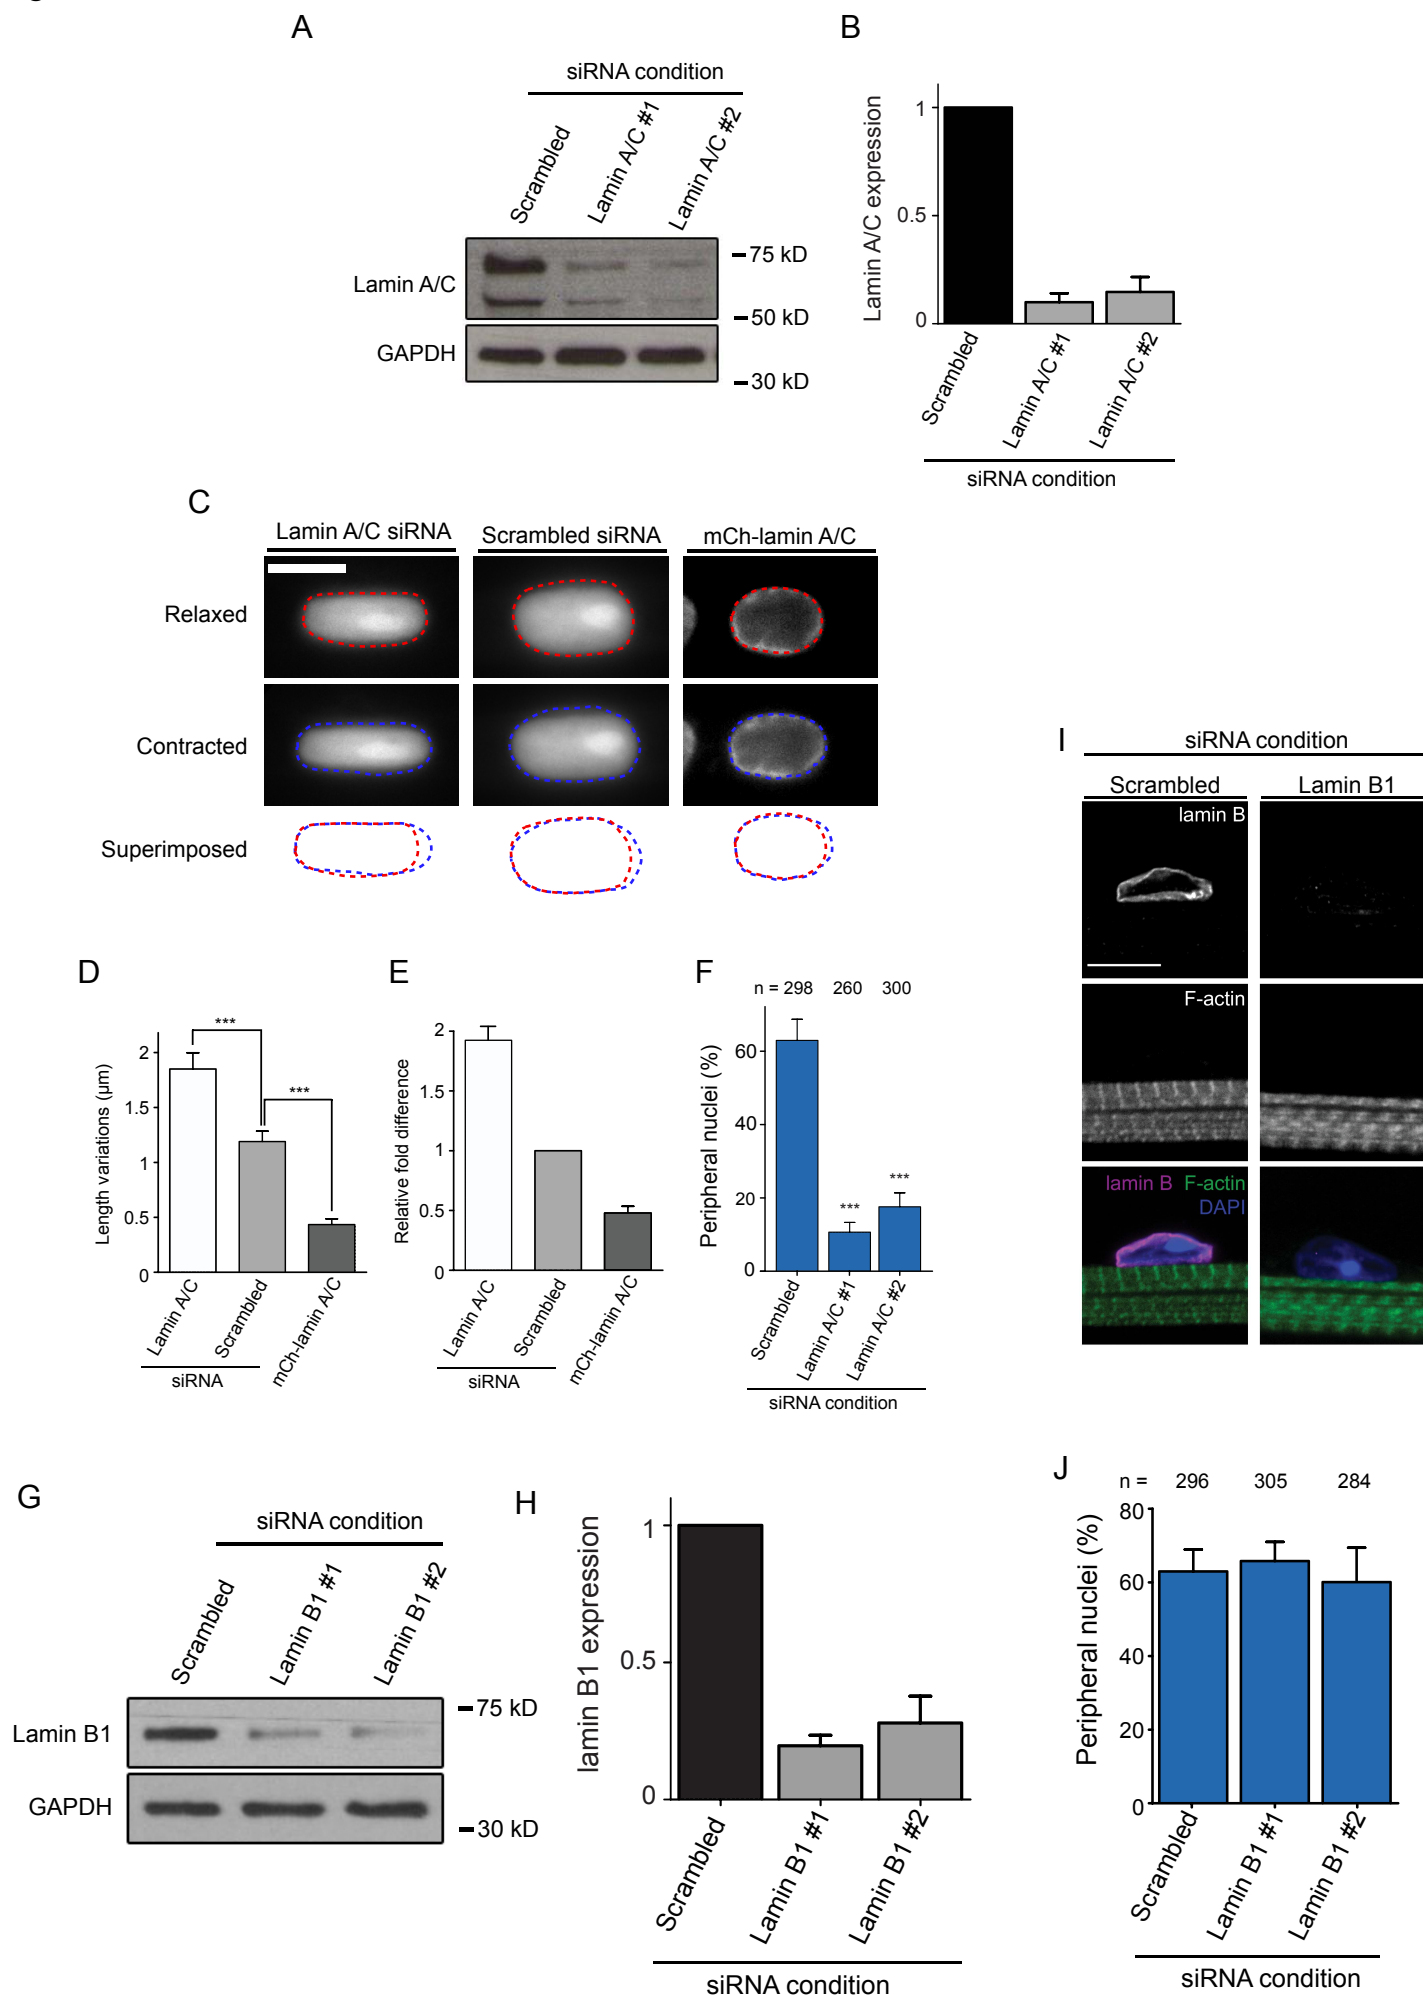

Supplement: NIHMS73663-supplement-Figure_S7.pdf [file NIHMS73663-supplement-Figure_S7.pdf]

Figure S8

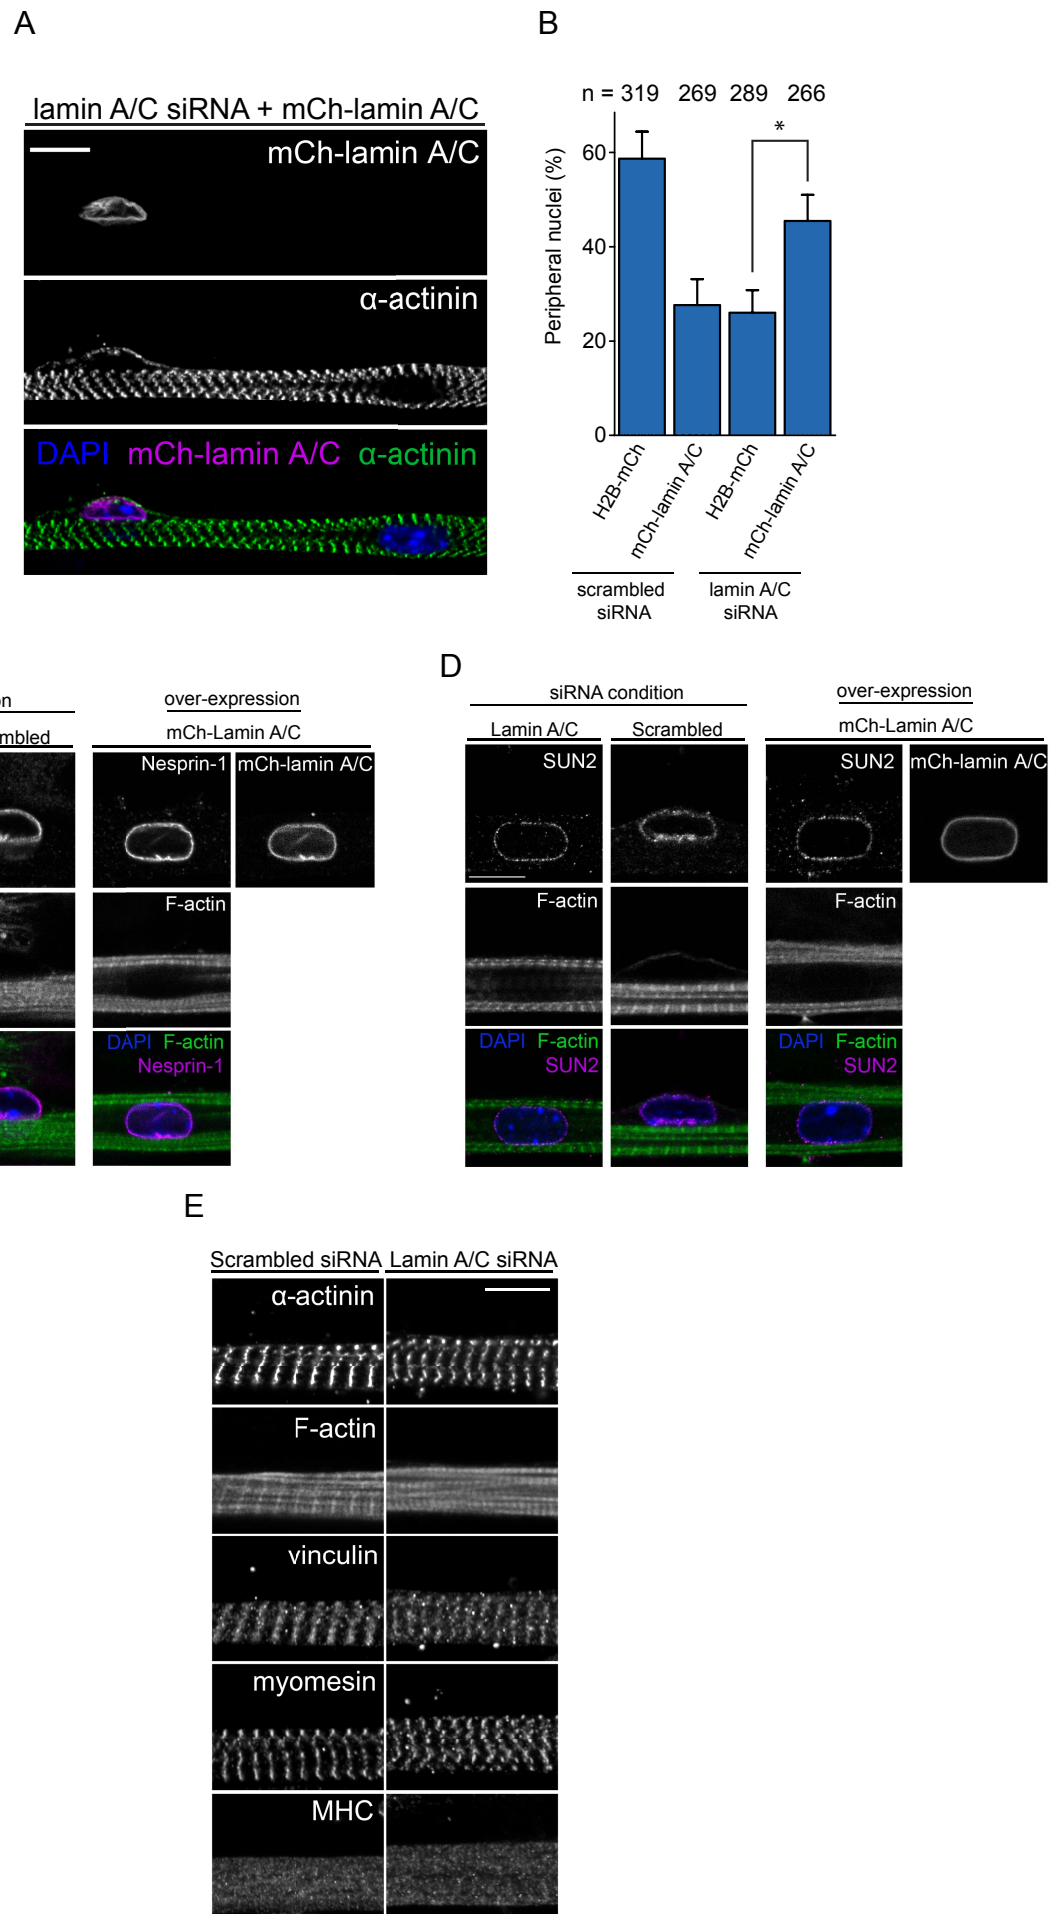

Supplement: NIHMS73663-supplement-Figure_S8.pdf [file NIHMS73663-supplement-Figure_S8.pdf]
